# Supplementary material
Source: PubMed Central journal article supplement (PMC4282438)

**Flow cytometry based enrichment for cell shape mutants identifies multiple genes that influence *Helicobacter pylori* morphology**

**Supplementary Materials**

Laura K. Sycuro<sup>1</sup>, Chelsea S. Rule<sup>1,2</sup>, Timothy W. Petersen<sup>3</sup>, Timna J. Wyckoff<sup>1,4</sup>, Tate Sessler<sup>1</sup>, Dilip B. Nagarkar<sup>1</sup>, Fakhra Khalid<sup>1</sup>, Zachary Pincus<sup>5</sup>, Jacoby Biboy<sup>6</sup>, Waldemar Vollmer<sup>6</sup>, and Nina R. Salama<sup>1,2</sup>

<sup>1</sup>Division of Human Biology, Fred Hutchinson Cancer Research Center, Seattle, WA, <sup>2</sup>Department of Microbiology, University of Washington School of Medicine, Seattle, WA, <sup>3</sup>BD Biosciences, Seattle, WA, <sup>4</sup>Division of Science and Mathematics, University of Minnesota, Morris, MN, <sup>5</sup>Department of Molecular, Cellular and Developmental Biology, Yale University, New Haven, CT, USA, <sup>6</sup>Centre for Bacterial Cell Biology, Institute for Cell and Molecular Biosciences, Newcastle University, Newcastle upon Tyne, United Kingdom.

**Inventory:**

**Table S1.** Muropeptide composition of His-Csd6 treated *csd6csd6* mutant sacculi.

**Table S2.** Bacterial strains

**Table S3.** Primers

**Figure S1.** Spectra illustrating the approximate position of gates utilized to enrich for shape mutants in morphological sorting feasibility experiments.

**Figure S2.** Low FSC gate used for FACS sort of *H. pylori* transposon mutant library.

**Figure S3.** Identification of insertions in known shape loci within the pooled FACS output population.

**Figure S4.** Morphological characterization of double mutants.

**Figure S5.** Loss or overexpression of *csd4* perturbs cell shape and length.

Table S1. Muropeptide composition of His-Csd6 treated *csd1csd6* mutant sacculi.

| <b>Peak No.</b> | <b>Muropeptide</b> | <b>DBH11<br/>+ buffer</b> | <b>DBH11<br/>+ His-Csd6</b> |
|-----------------|--------------------|---------------------------|-----------------------------|
| 1               | Tri                | 0.0                       | 12.7                        |
| 2               | Tetra              | 13.0                      | 0.0                         |
| 3               | Penta(Gly5)        | 4.5                       | 4.6                         |
| 4               | Di                 | 0.0                       | 0.0                         |
| 5               | Penta              | 30.4                      | 31.1                        |
| 6               | TetraTri           | 0.0                       | 0.6                         |
| 7               | TetraPenta(Gly5)   | 3.8                       | 3.3                         |
| 8               | TetraTetra         | 9.3                       | 9.0                         |
| 9               | TetraPenta         | 14.1                      | 13.5                        |
| 10              | PentaAnh           | 1.6                       | 1.7                         |
| 11              | TetraTriAnh I      | 0.0                       | 0.7                         |
| 12              | TetraTriAnh II     | 0.0                       | 0.1                         |
| 13              | TetraTetraAnh I    | 6.9                       | 6.1                         |
| 14              | TetraTetraAnh II   | 2.0                       | 1.6                         |
| 15              | TetraPentaAnh      | 7.5                       | 7.3                         |
| 1 - 15          | all known          | 93.0                      | 92.5                        |

Table S2. Bacterial strains.

| Name      | Relevant Genotype or Description                             | Reference or Source      |
|-----------|--------------------------------------------------------------|--------------------------|
| NSH57     | Wild-type <i>H. pylori</i> : mouse-adapted G27               | (Baldwin et al., 2007)   |
| LSH100    | Wild-type <i>H. pylori</i> : NSH57 with <i>fliM</i> repaired | (Lowenthal et al., 2009) |
| LSH18     | $\Delta$ <i>csd4::catsacB</i> in NSH57                       | (Sycuro et al., 2012)    |
| KGH10     | $\Delta$ <i>ccmA::catsacB</i> in NSH57                       | (Sycuro et al., 2010)    |
| LSH112    | $\Delta$ <i>csd3::catsacB</i> in NSH57                       | (Sycuro et al., 2010)    |
| P1S1G1_5  | <i>csd6:tnGPScat</i> in NSH57                                | this study               |
| TSH17     | $\Delta$ <i>csd6::cat</i> in LSH100                          | this study               |
| TSH31     | $\Delta$ <i>csd6::cat</i> <i>McGee::csd6:aphA3</i> in LSH100 | this study               |
| TSH35     | <i>McGee::csd6:aphA3</i> in LSH100                           | this study               |
| LSH79     | <i>rdxA::csd4</i> in NSH57                                   | this study               |
| LSH104    | $\Delta$ <i>csd4::catsacB</i> <i>rdxA::csd4</i> in NSH57     | (Sycuro et al., 2012)    |
| P1S1G1_6  | <i>HPG27_458:tnGPScat</i> in NSH57                           | this study               |
| P1S1G1_9  | <i>HPG27_866:tnGPScat</i> in NSH57                           | this study               |
| P1G1S1_11 | <i>HPG27_355:tnGPScat</i> in NSH57                           | this study               |
| P1G1S1_12 | <i>HPG27_1132:tnGPScat</i> in NSH57                          | this study               |
| P1S1G1_20 | <i>HPG27_782:tnGPScat</i> in NSH57                           | this study               |
| MHH17     | $\Delta$ <i>HPG27_782::cat</i> in NSH57                      | this study               |
| P4G1S1_29 | <i>mviN:tnGPScat</i> in NSH57                                | this study               |
| TSH1      | $\Delta$ <i>mviN::cat</i> in LSH100                          | this study               |
| TSH13     | $\Delta$ <i>mviN::cat</i> <i>rdxA::mviN</i> in LSH100        | this study               |
| LSH154    | <i>Csd1H250A</i> in NSH57                                    | (Sycuro et al., 2010)    |
| LSH28     | <i>Csd4E222A</i> in NSH57                                    | (Sycuro et al., 2012)    |
| DBH11     | <i>Csd1H250A</i> $\Delta$ <i>csd6::cat</i> in NSH57          | this study               |
| TSH27     | <i>Csd4E222A</i> $\Delta$ <i>csd6::cat</i> in NSH57          | this study               |
| DH10B     | <i>E. coli</i> cloning strain                                | Invitrogen               |
| BL21(DE3) | <i>E. coli</i> protein expression strain                     | Invitrogen               |

Table S3. Primers.

| Name                               | Sequence                                         |
|------------------------------------|--------------------------------------------------|
| <i>Transposon primers</i>          |                                                  |
| N3                                 | TTTAATACGACGGGCAATTTGCACTTCAG                    |
| N2                                 | CAGTTTAAGACTTTATTGTC                             |
| S                                  | TAATCCTTAAAACTCCATTTCCACCCCT                     |
| S2                                 | AGTTCCCAACTATTTTGTCC                             |
| <i>Shape loci primers</i>          |                                                  |
| HPG27_353-359u-5-XhoI              | CCCTCGAGATGATAGAAGCTTGCAAAGCG                    |
| HPG27_353-356d-3-EcoRI             | ACATGCATAGCTCCATCAGG                             |
| HPG27_1197-311u-5                  | CACTGATTCTATGGGCGTTA                             |
| HPG27_1195-315d-3                  | CCTAAAGCGTCGGTATTGTA                             |
| HPG27_1483-955-5                   | GACGCTTTTTTGGTGCTAGAA                            |
| HPG27_1479-256-3                   | GCGCTAATAGGGGCAATGATG                            |
| HPG27_464-193u-5                   | AGAAAGGGAATATCCAACGC                             |
| HPG27_464-242d-3                   | TTACGCGCATAAATGGCTGG                             |
| <i>Targeted disruption primers</i> |                                                  |
| hp0823-5                           | CTCAAATCAGCGCGATTTTAGC                           |
| hp0823-3M                          | ATCCACTTTTCAATCTATATCTTCTTCAGCC<br>TTTAAGCCC     |
| hp0823-5M                          | CCCAGTTTGTGCGCACTGATAACCCAAAAAGAT<br>CCCAATAGCG  |
| hp0823-3                           | AAAATCCACTAACGCAACCCC                            |
| HPG27_477FO                        | ACCGGCTCTGTTAATGG                                |
| HPG27_477RI                        | ATCCACTTTTCAATCTATATCACTCTAACTAG<br>GCTTGGATT    |
| HPG27_477FI                        | CCCAGTTTGTGCGCACTGATAACTTCACTCGCT<br>ATGACGG     |
| HPG27_477_RO                       | GAATTGGAGCTATAAGAGAGC                            |
| 838.1                              | GCTCTAGAAATTGTTGCAATTCACCCACCAA                  |
| 838.3                              | ATCCACTTTTCAATCTATATCCATAAAATCCCT<br>AAGCTGTTGGT |
| 838.2                              | ACGCGTCGACAAGATTACAAGCCATGATTTTA<br>AA           |
| 838.4                              | CCCAGTTTGTGCGCACTGATAAAAGGGGGCAA<br>TTTAGCCCT    |
| <i>Complementation primers</i>     |                                                  |
| 1 sacI                             | GCGCGAGCTCAAGGGTTTCTTTAGGGAT                     |
| 3 sacI                             | GCGCGAGCTCCATCATTAACATCATTATCG                   |
| 2 kpnI                             | GCGCGGTACCCTGTTCTAATGGGGTGT                      |
| 4 kpnI                             | GCGCGGTACCGGCATATTTTCCCTTATAT                    |
| Kan1 Sall                          | GCGCGTCGACACAGAATTACTCTATGAAGCG                  |
| Kan2 XhoI                          | GCGCCTCGAGATCTAGGTAATAAACAATTC                   |
| csd6p1 XbaI                        | GCGCTCTAGAGACTCCGTTCCAATCG                       |
| csd6p2 BamHI                       | GCGCGGATCCTACATCCCCTTTAAGTTGTAAG                 |
| csd6.1-EcoRI                       | GCGCGAATTCGAAGAAAAGAGCTTGCAA                     |
| csd6.2-ClaI                        | GCGCATCGATAGTTTGAGCGCGAA                         |
| <i>Protein expression primers</i>  |                                                  |
| 5'Ndecsd6                          | GCGCGCGCATATGAGTGATCGTTTGTAG                     |
| 3'XhoISTOPcsd6                     | GCGCGCGCTCGAGTTATTTTCCATTATG                     |

**Figure S1.** Spectra illustrating the approximate position of gates utilized to enrich for shape mutants in morphological sorting feasibility experiments. Color density plots of spectra for wild-type cells (top row) and each class of shape mutant (bottom row). Pink outlines illustrate inclusion gates used to sort mixed culture populations containing each respective mutant and wild-type. The number outside each gate provides the percent of each single strain population that would be expected to sort into the gate. Strains used: NSH57, LSH18, KGH10, LSH112.

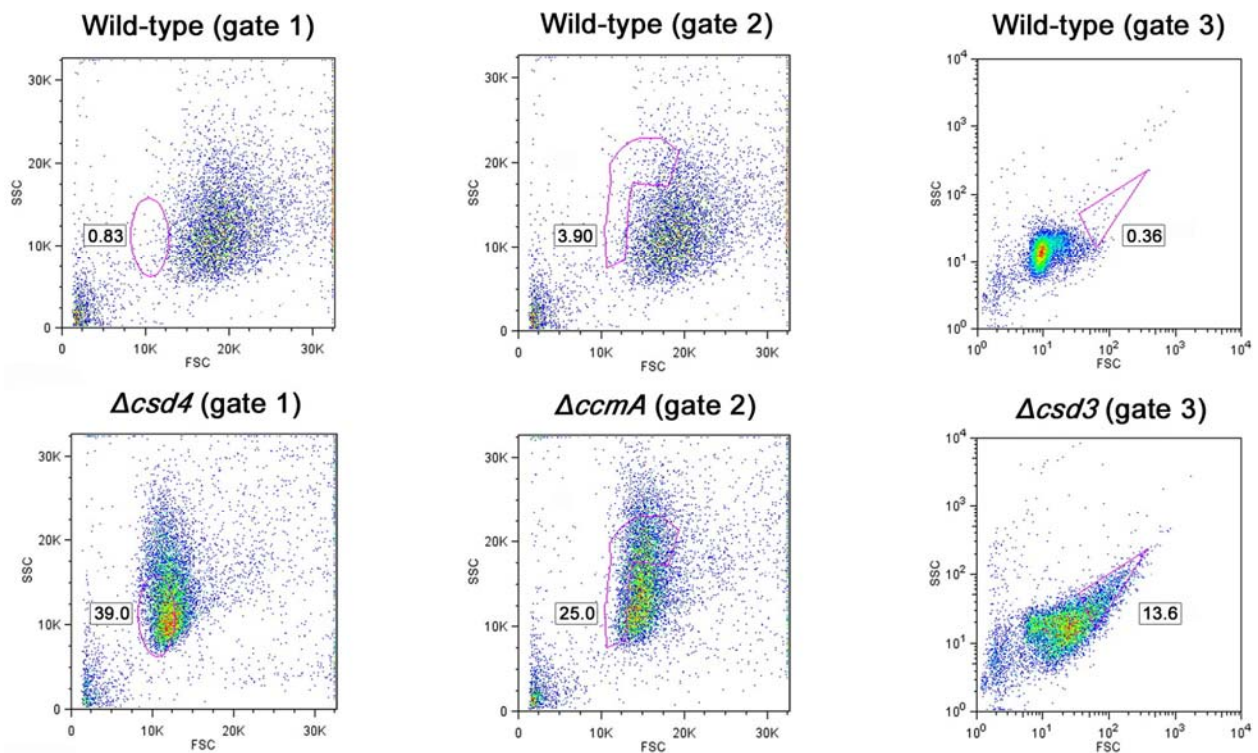

**Figure S2.** Low FSC gate used for FACS sort of *H. pylori* transposon mutant library. The light gray ovals show the gate position overlaying the wild-type (red arrow) and *csd4* mutant scatter plots generated on the day of the sort. ~25% the  $\Delta csd4$  straight rod mutant and ~0.5% of the wild-type populations were included by the gate (red boxes), suggesting the library sort might be expected to enrich for straight rod mutants by 50-fold.

### Wild-type

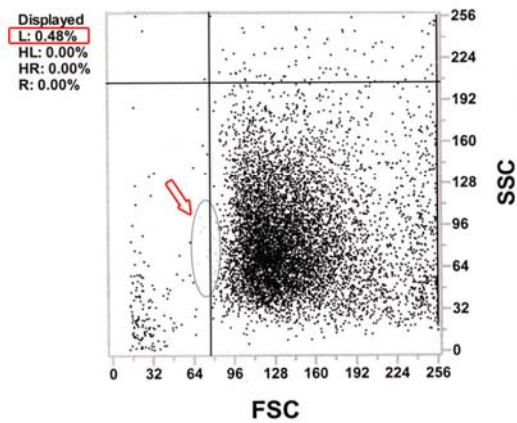

### $\Delta csd4$ (straight rod)

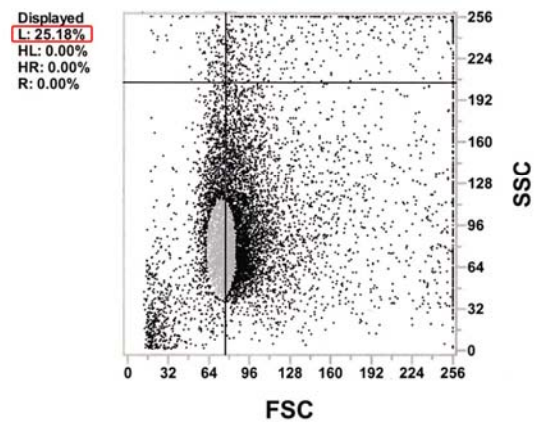

**Figure S3.** Identification of insertions in known shape loci within the pooled FACS output population. CEKG PCR was performed using a primer upstream (5') or downstream (3') of each shape locus paired with primer N3, which anneals within the transposon, as described in Experimental Procedures. M, 1 kb DNA ladder; F, forward oriented insertions detected with 3' primer; R, reverse oriented insertions detected with the 5' primer.

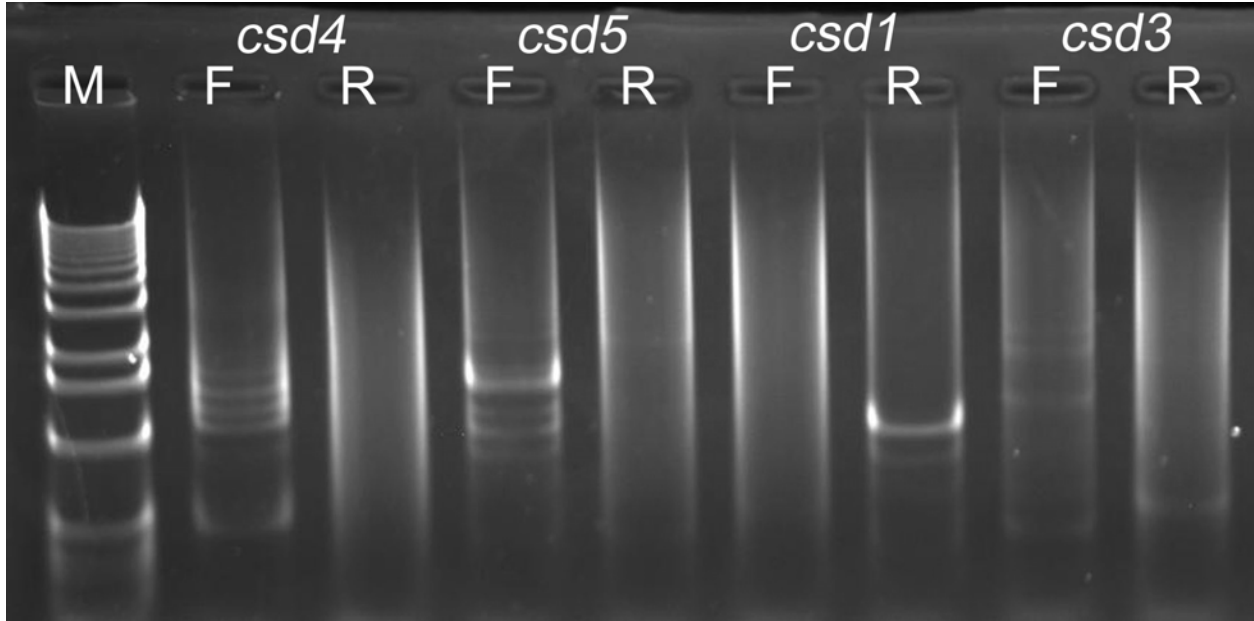

**Figure S4.** Morphological characterization of double mutants. A,C) Scatter plots arraying indicated populations by cell length (x-axis,  $\mu\text{m}$ ) and cell curvature (y-axis, arbitrary units). B,D) Smooth histograms displaying population cell curvature (x-axis) as a density function (y-axis). Bootstrapped Komolgorov–Smirnov (KS) statistics of population cell curvature distributions: wild-type vs. all strains  $p < 0.00001$ , *csd1* vs. *csd6*  $p < 0.00001$ , *csd1* vs. *csd1csd6*  $p = 0.00003$ , *csd6* vs. *csd1csd6*  $p < 0.00001$ , *csd4* vs. *csd6*  $p = 0.32304$ , *csd4* vs. *csd4csd6*  $p = 0.00043$ , *csd6* vs. *csd4csd6*  $p = 0.00136$ . Strains used: LSH100, LSH13, LSH18, TSH17, DBH11, TSH27.

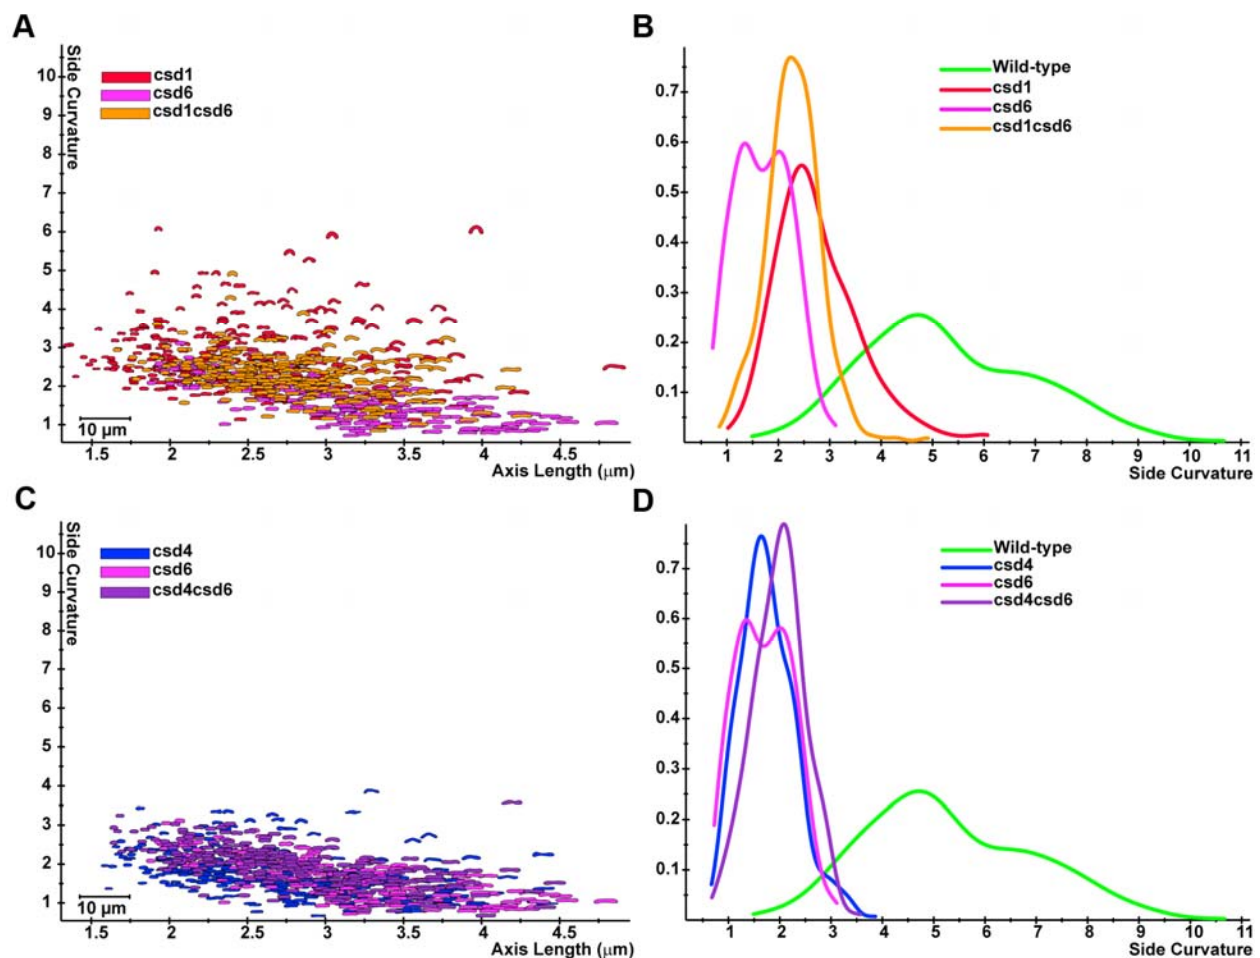



**Figure S5.** Loss or overexpression of *csd4* perturbs cell shape and length. A–B) Scatter plots arraying cell length (x-axis,  $\mu\text{m}$ ) and cell curvature (y-axis, arbitrary units). Each point represents the outline of the cell image obtained by phase contrast microscopy. C) Smooth histogram displaying population cell curvature (x-axis, arbitrary units) as a density function (y-axis). D) Smooth histogram (kernel density estimate) displaying axis length (x-axis,  $\mu\text{m}$ ) as a density function (y-axis). *csd4* mutant ( $\Delta\text{csd4}$ ), complemented (*csd4cmpl*) and merodiploid (*csd4OP*). Strains used: LSH100, LSH18, LSH104, LSH79.

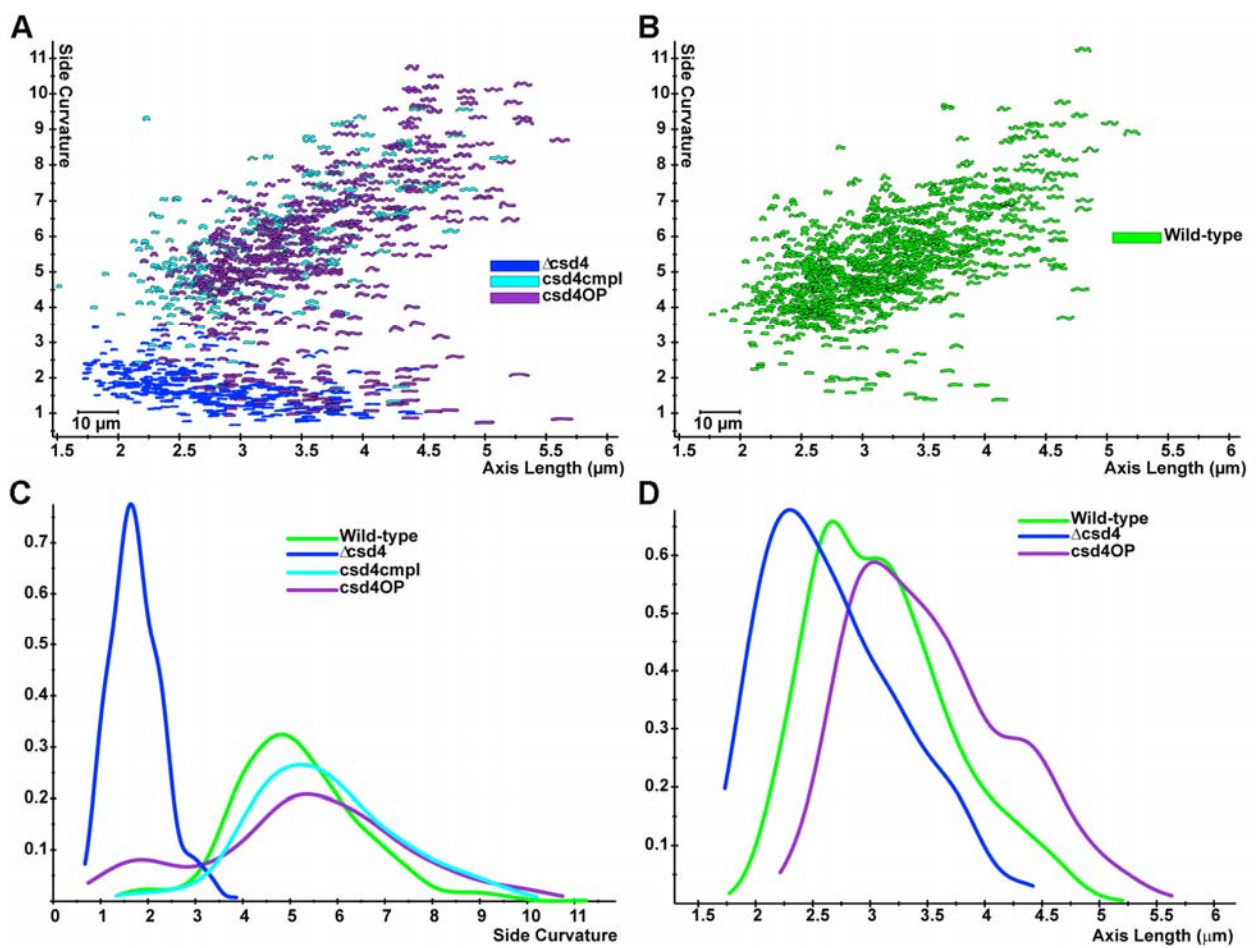

Supplement: mmi0090-0869-SD1.pdf [file mmi0090-0869-SD1.pdf]
